# Supplementary material for: Water-dispersible magnetite-graphene-LDH composites for efficient arsenate removal
Source: Royal Society of Chemistry journal article supplement (doi:10.1039/c1jm12678d), 2011-01-01
Supplement: c1jm12678d.pdf [file c1jm12678d.pdf]

## *Supplementary Information*

### **Water-dispersible magnetite-graphene-LDH composites for efficient arsenate removal**

*Xi-Lin Wu<sup>1, 2</sup>, Lei Wang<sup>3</sup>, Chang-Lun Chen<sup>2</sup>, An-Wu Xu<sup>3</sup>, Xiang-Ke Wang<sup>1, 2</sup>*

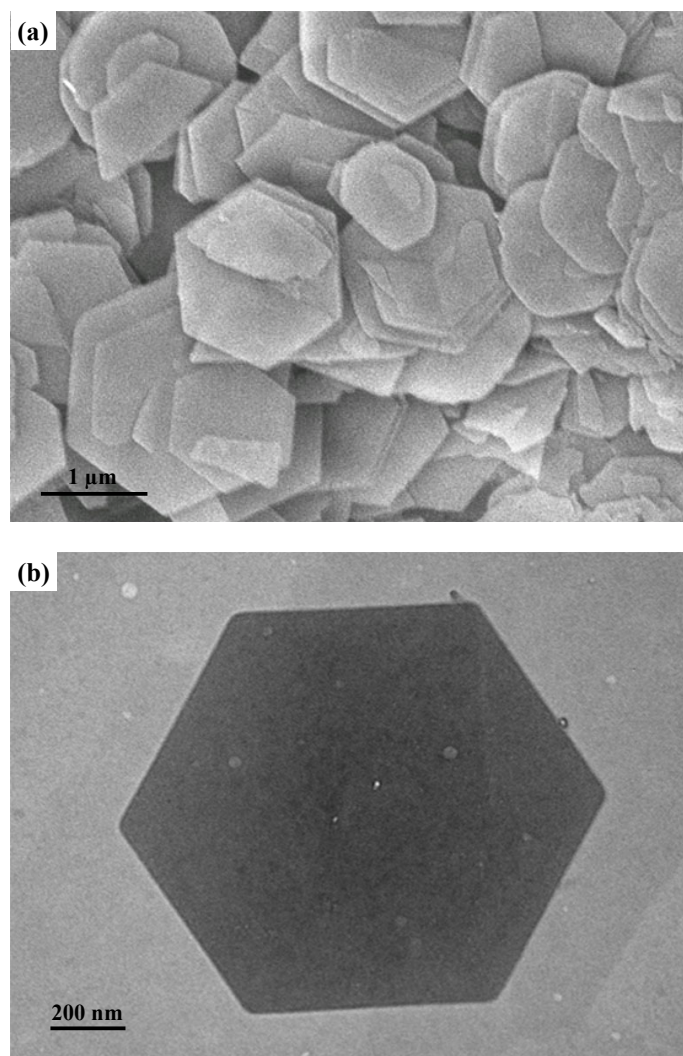

**Fig. S1.** SEM image of Mg/Al LDHs (a), and TEM image of Mg/Al LDHs (b).

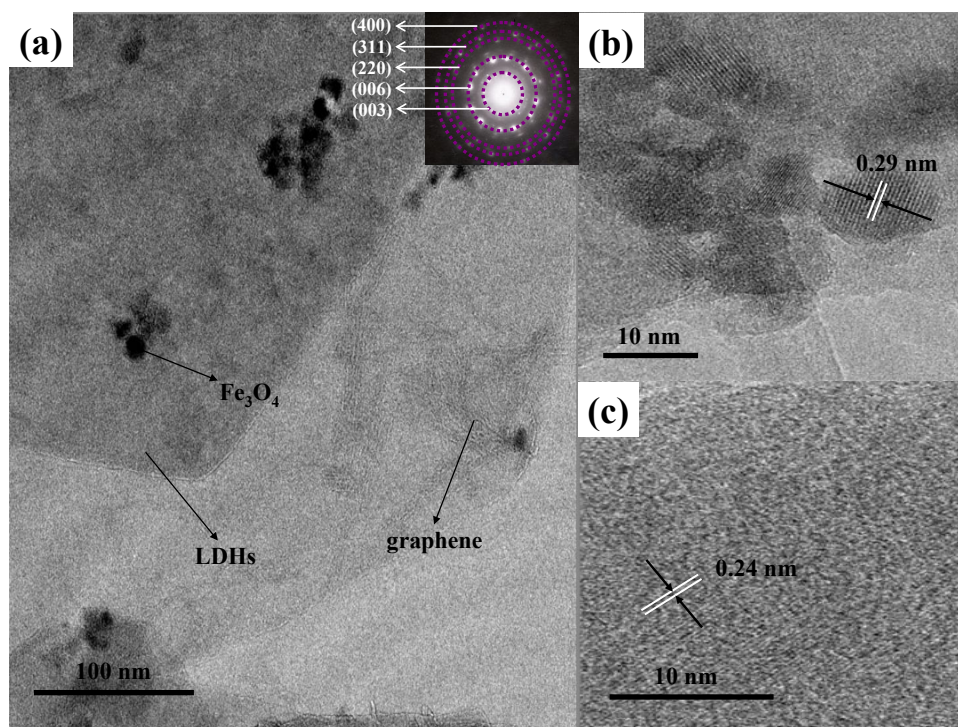

**Fig. S2.** TEM image of MGL (the inset in (a) is the SAED pattern of Fe<sub>3</sub>O<sub>4</sub> and LDHs) (a), HR-TEM images of MGL, diffraction pattern of Fe<sub>3</sub>O<sub>4</sub> (b) and LDHs (c).

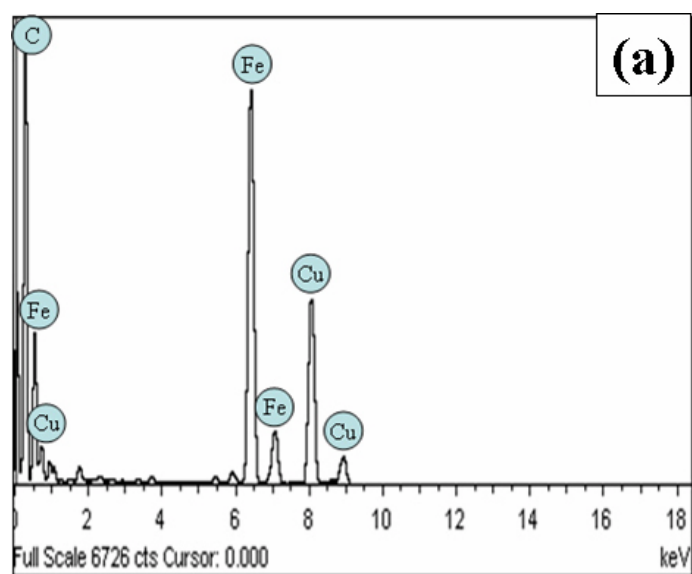

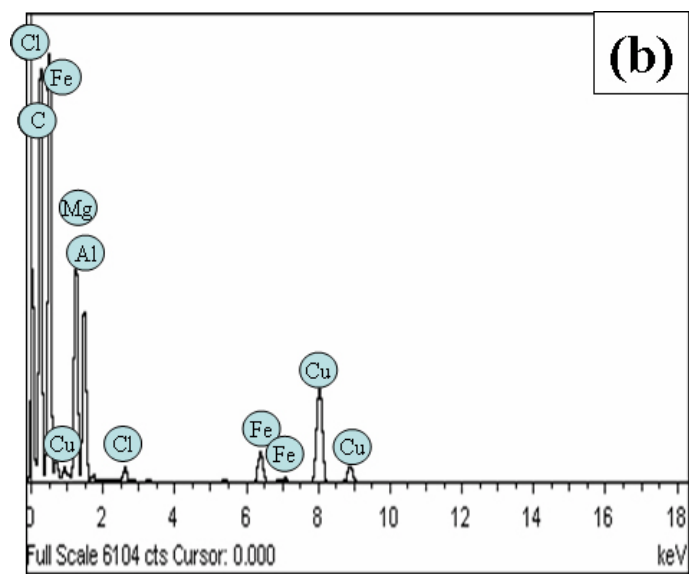

**Fig. S3.** EDS spectrum of MG (a), and MGL (b). Cu peak came from the TEM grid.

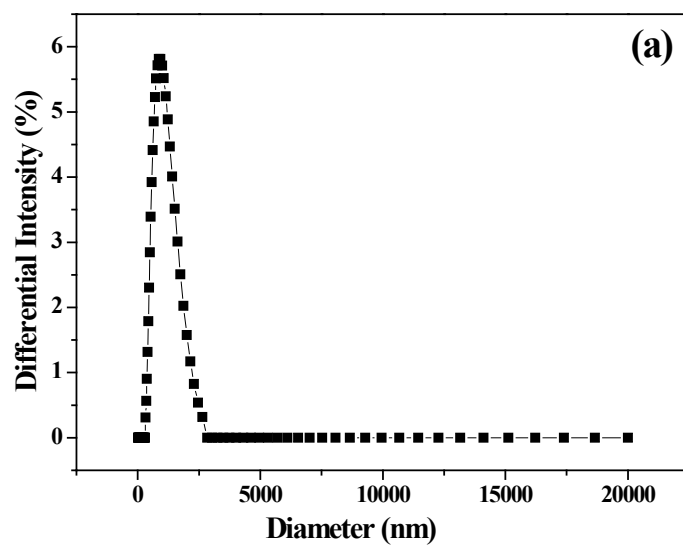

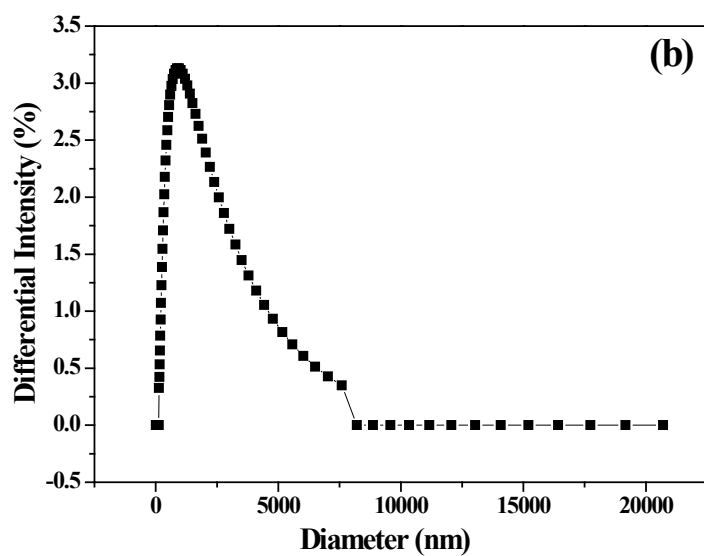

Fig. S4. Particle size distribution of the Mg/Al LDHs (a), and MGL composites (b).

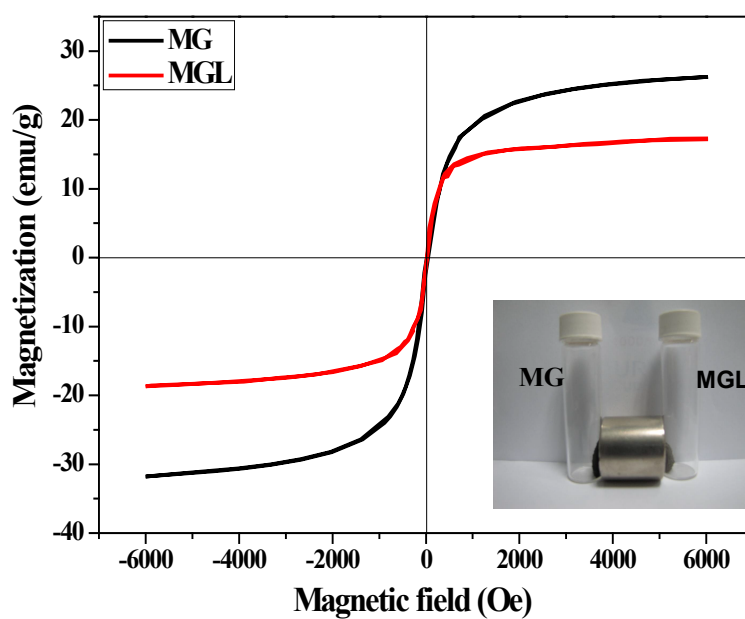

Fig. S5. Hysteresis curves of MG and MGL.
